# Supplementary material
Source: publisher site journal article supplement (https://www.spandidos-publications.com/3556/downloadSupplementary)

Figure S1. Transfection efficiency of miR-545-5p mimic, miR-545-5p inhibitor and DIMT1 plasmid were validated via RT-qPCR analysis. Saos-2 or MG63 cells were transfected with (A) miR-545-5p mimic, (B) miR-545 inhibitor, (C) DIMT1 plasmid and their corresponding NCs. Relative expression levels of miR-545-5p or DIMT1 were detected via RT-qPCR analysis 48 h post-transfection. Data are presented as the mean  $\pm$  SD (n=3). \*\*P<0.01. miR, microRNA; DIMT1, dimethyladenosine transferase 1; RT-qPCR, reverse transcription-quantitative PCR; NC, negative control.

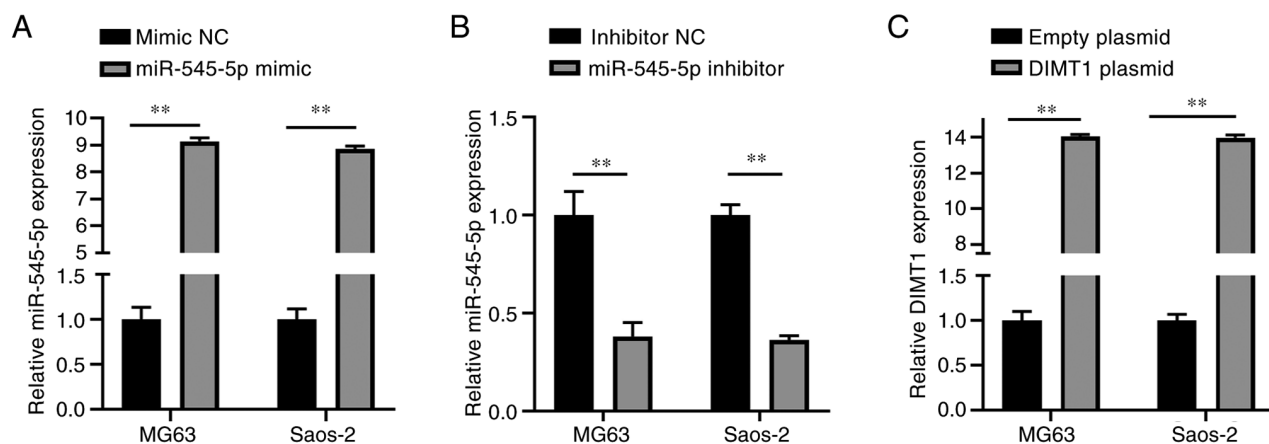

Supplement: Supplementary file 1 [file downloadSupplementary]
